# Supplementary material for: A Novel Artificial Hemoglobin Carrier Based on Heulandite-Calcium Mesoporous Aluminosilicate Particles
Source: MDPI journal article supplement (doi:10.3390/ijms23137460), 2022-07-05
Supplement: s1 [file s1]

## Supplementary Material

### **A Novel Artificial Hemoglobin Carrier Based on Heulandite-Calcium Mesoporous Aluminosilicate Particles**

**Dino Jordanoski <sup>1</sup>, Damjana Drobne <sup>1</sup>, Neža Repar <sup>1</sup>, Iztok Dogša <sup>1</sup>, Polona Mrak <sup>1</sup>, Romana Cerc-Korošec <sup>2</sup>, Andrijana Sever Škapin <sup>3</sup>, Peter Nadrah <sup>3</sup>, Nataša Poklar Ulrih <sup>1\*</sup>**

<sup>1</sup> University of Ljubljana, Biotechnical Faculty, Jamnikarjeva 101, 1000 Ljubljana, Slovenia; Dino Jordanoski: dj6841@student.uni-lj.si. Damjana Drobne: damjana.drobne@bf.uni-lj.si. Neža Repar: neza.repar@bf.uni-lj.si. Iztok Dogša: iztok.dogsa@bf.uni-lj.si. Polona Mrak: polona.mrak@bf.uni-lj.si. Nataša Poklar Ulrih: natasa.poklar@bf.uni-lj.si.

<sup>2</sup> University of Ljubljana, Faculty of Chemistry and Chemical Technology, Večna pot, 1000 Ljubljana, Slovenia; Romana Cerc-Korošec: romana.cerc-korosec@fkkt.uni-lj.si.

<sup>3</sup> Slovenian National Building and Civil Engineering institute, Dimičeva ulica 12, 1000 Ljubljana, Slovenia; Andrijana Sever Škapin: andrijana.skapin@zag.si. Peter Nadrah: peter.nadrah@zag.si.

\* Correspondence: Nataša Poklar Ulrih: natasa.poklar@bf.uni-lj.si; Tel.: (+386 1 3203 780, 100 Ljubljana, Slovenia)

**A**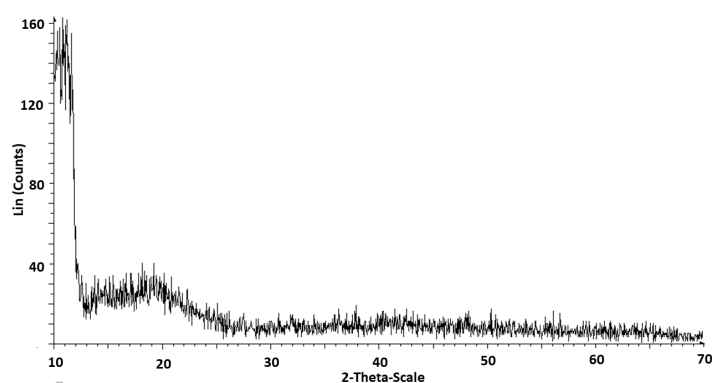**B**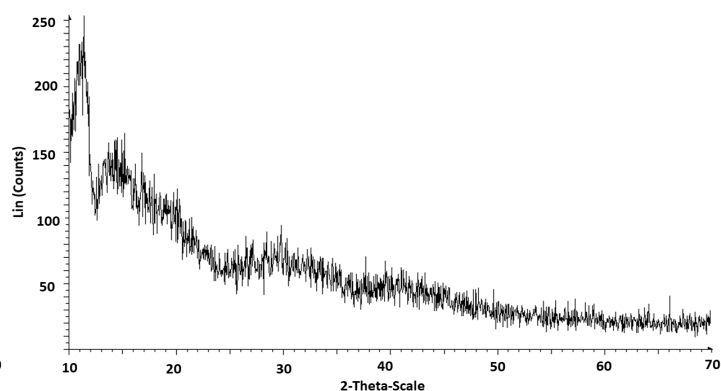

**Figure S1.** X-ray diffraction patterns of empty liposomes (LB) (A) and liposome-encapsulated MSPs (LB-MSPs)(B).

**A**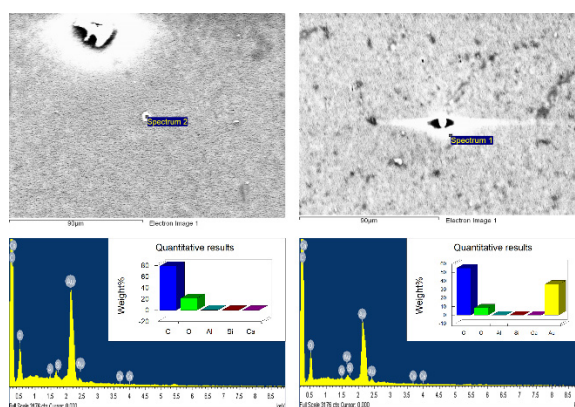

**Figure S2.** Field emission SEM energy dispersive spectroscopy analysis of empty liposomes (A) and liposome-encapsulated MSPs (B).

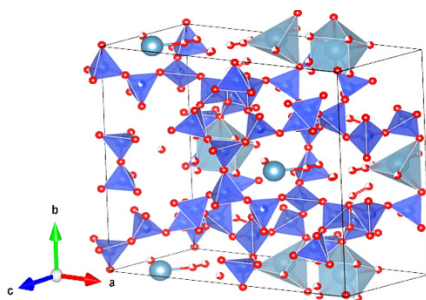

**Figure S3.** Crystal structure of heulandite-Ca, visualized using the VESTA software, with atom coordinates from the American Mineralogist Crystal Structure Database (VESTA, n.d.).

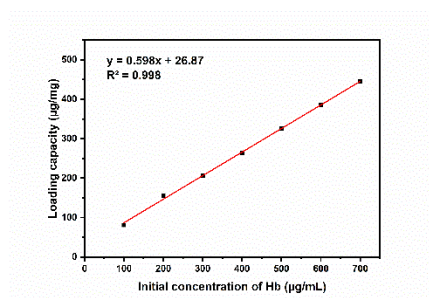

**Figure S4.** Hemoglobin-loading capacity for MSPs at low-loading concentrations, using a plate reader (Safire 2; Tecan; absorbance, 405 nm; 400-700 µg/mL).

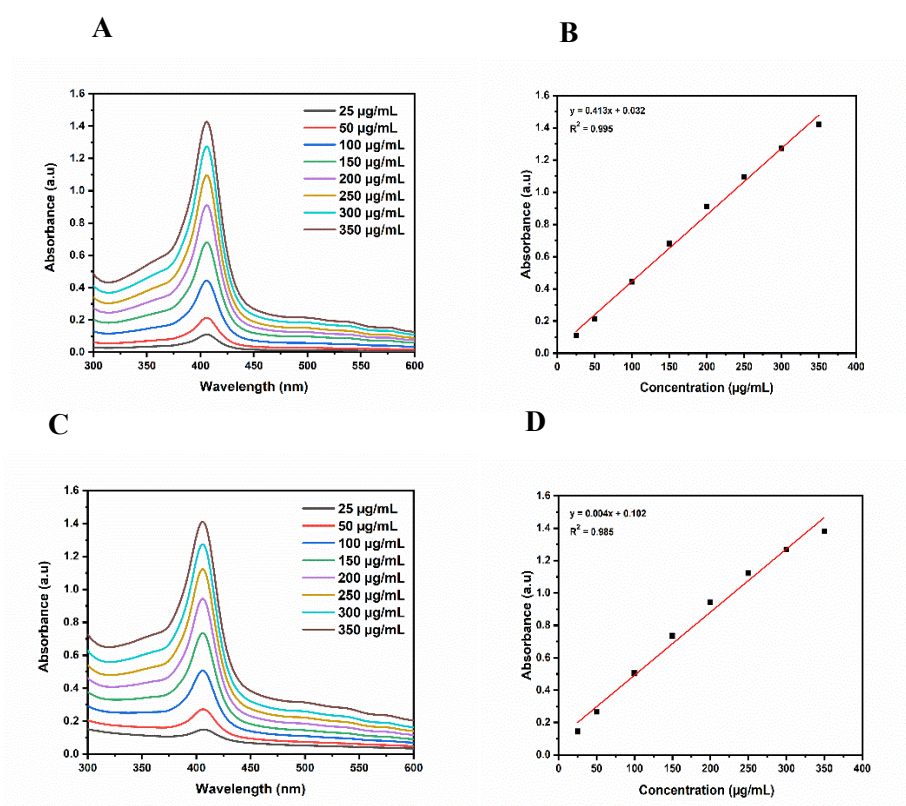

**Figure S5.** (A, C) UV-VIS absorbance spectra of Hb (25-350 µg/mL; 1 mM PB as control) (A) and Hb-loaded MSPs (25-350 µg/mL; 250 µg/mL MSPs in 1 mM PB as

control) (C). (B, D) Standard curves for absorbance (405 nm) of Hb (B) and Hb-loaded MSPs (D).

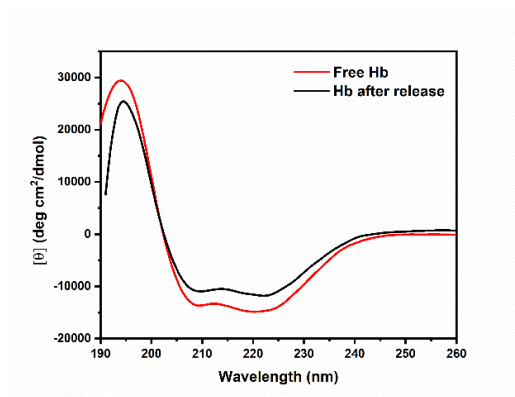

**Figure S6.** Far-UV circular dichroism spectra of free Hb and Hb after release from Hb-loaded MSPs.

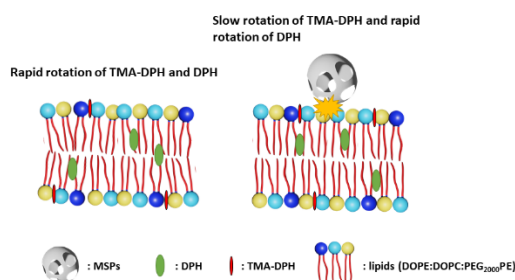

**Figure S7.** Schematic illustration of the MSP–liposome membrane interactions. DPH, 1,6-diphenylhexatriene; TMA-DPH, DPH trimethylammonium derivative; DOPE, 1,2-dioleoyl-*sn*-glycero-3-phosphoethanolamine; DOPC, 1,2-dioleoyl-*sn*-glycero-3-phosphocholine; PEG, polyethylene glycol.

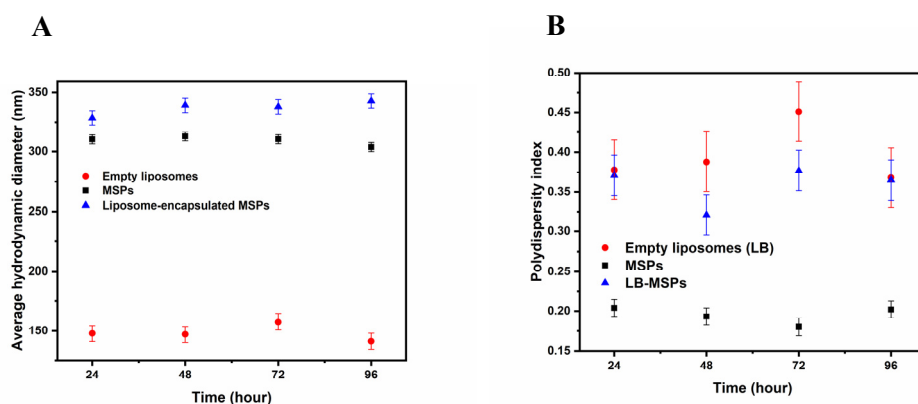

**Fig. S8.** (A) Size stability of LB, MSPs and LB-MSPs; (B) Corresponding PDI values.

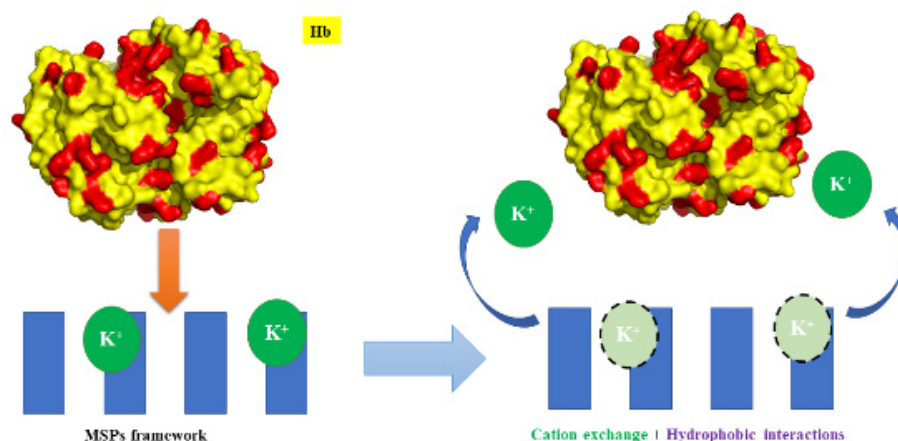

**Figure S9.** Schematic diagram of adsorption of hemoglobin (Protein) onto natural zeolite (heulandite-Ca). The hydrophobic surface of hemoglobin was modeled with the PyMOL software, version 2.4.1. Yellow, Hb backbone; red, Hb positively charged amino acids (i.e., Arg, His, Lys).

**Table S1.** Summary of hemoglobin effects upon interaction with tetraethyl orthosilicate (TEOS)-based particles and heulandite-Ca MSPs.

| Analysis technique                      | Particle type                                       |                                                                                    |
|-----------------------------------------|-----------------------------------------------------|------------------------------------------------------------------------------------|
|                                         | TEOS-based particles                                | Heulandite-Ca MSPs                                                                 |
| Fourier transform infrared spectroscopy | Structural changes induced                          | Partial denaturation and successful binding                                        |
| Fluorescence spectroscopy               | Degradation induced                                 | Partial denaturation and successful binding                                        |
| Circular dichroism                      | Displacement and denaturation                       | Partial denaturation                                                               |
| UV-Vis spectroscopy                     | Iron release induced at low particle concentrations | Iron release induced at high particle concentrations ( $\geq 100 \mu\text{g/mL}$ ) |
| Peroxidase-like activity                | Preserved redox activity of bound hemoglobin        | Higher redox activity of bound hemoglobin                                          |

|                     |                                                                 |                                                 |
|---------------------|-----------------------------------------------------------------|-------------------------------------------------|
| <b>Cytotoxicity</b> | Cytotoxic at low concentrations<br>( $\geq 10 \mu\text{g/mL}$ ) | No cytotoxicity up to $\geq 100 \mu\text{g/mL}$ |
|---------------------|-----------------------------------------------------------------|-------------------------------------------------|
